# Supplementary material for: Improving the performance of FAPbI3 perovskite solar cells using a self-assembled monolayer
Source: Royal Society of Chemistry journal article supplement (doi:10.1039/d6ra02657e), 2026-05-20
Supplement: d6ra02657e1.pdf [file d6ra02657e1.pdf]

## Improving performance of $\text{FAPbI}_3$ perovskite solar cells by self-assembled monolayer

Mustafa Kareem<sup>1,2,\*</sup>, Mustafa Abdullah<sup>3</sup>, Chetansinh R. Vaghela<sup>4</sup>, Kiran K. S.<sup>5</sup>, Parasuraman K.<sup>6</sup>, Sanjeev Kumar<sup>7</sup>

<sup>1</sup>College of Remote Sensing and Geophysics, Al-Karkh University of Science, Haifa St., Baghdad 10011, Iraq

<sup>2</sup>College of Science, University of Warith Al-Anbiyaa, 56001 Karbala, Iraq

<sup>3</sup>Electric Vehicles Engineering Department, Faculty of Engineering, Hourani Center for Applied Scientific Research, Al Ahliyya Amman University, Amman, Jordan

<sup>4</sup>Faculty of Science, Gokul Global University, Sidhpur, Gujarat, India

<sup>5</sup>Department of Physics, School of Engineering and Technology, JAIN (Deemed to be University), Bangalore, Karnataka, India

<sup>6</sup>Department of physics, Sathyabama Institute of Science and Technology, Chennai, Tamil Nadu, India

<sup>7</sup>Department of Physics, University Institute of Sciences, Chandigarh University, Mohali, Punjab, India

\*Corresponding author email: [dr.mustafa@kus.edu.iq](mailto:dr.mustafa@kus.edu.iq)

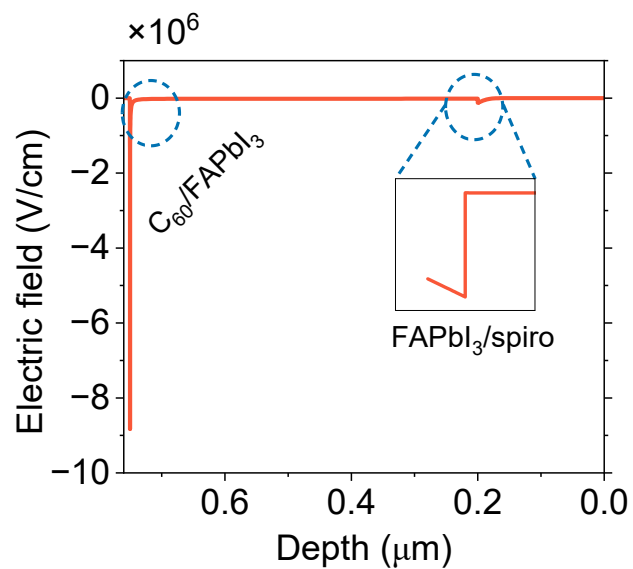

**Figure S1:** Electric field distribution across HPSC.

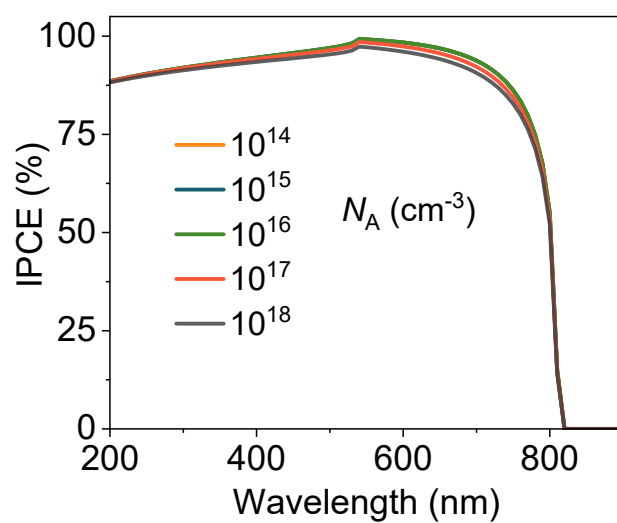

**Figure S2:** IPCE spectra of HPSC at different acceptor concentrations.

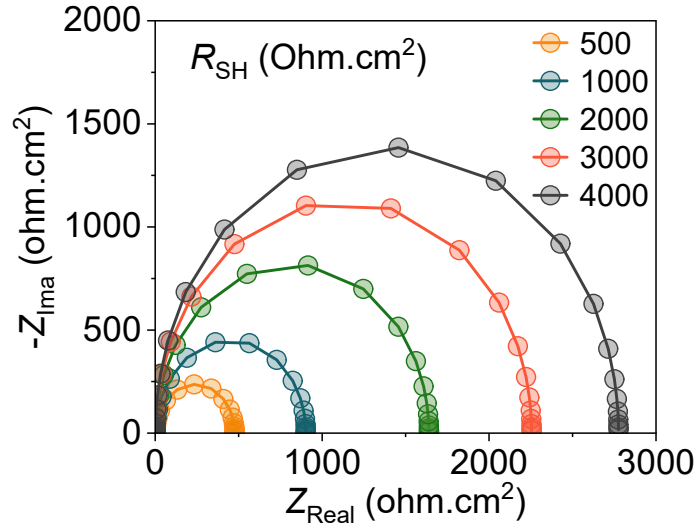

**Figure S3:** Nyquist plots of HPSC at different shunt resistances.

**Table S1.** The key parameters of PSC at interfaces.

| Parameters/Interfaces                                  | C <sub>60</sub> -SAM/FAPbI <sub>3</sub> | FAPbI <sub>3</sub> /spiro-OMeTAD |
|--------------------------------------------------------|-----------------------------------------|----------------------------------|
| Defect type                                            | Neutral                                 | Neutral                          |
| Capture cross section for electrons (cm <sup>2</sup> ) | 1.0 × 10 <sup>-19</sup>                 | 1.0 × 10 <sup>-19</sup>          |
| Capture cross section for holes (cm <sup>2</sup> )     | 1.0 × 10 <sup>-19</sup>                 | 1.0 × 10 <sup>-19</sup>          |
| Energetic Distribution                                 | Single                                  | single                           |
| Reference for defect energy level E <sub>t</sub>       | Above the highest E <sub>v</sub>        | Above the highest E <sub>v</sub> |
| Energy with respect to reference (eV)                  | 0.600                                   | 0.600                            |
| Total defect density (cm <sup>-2</sup> )               | 1.02 × 10 <sup>12</sup>                 | 1.02 × 10 <sup>12</sup>          |
